# Supplementary material
Source: PubMed Central journal article supplement (PMC6913121)
Supplement: Supp_Table1.pdf [file Supp_Table1.pdf]

## Supplementary Data

SUPPLEMENTARY TABLE S1. NONSOLICITED ADVERSE EVENTS REPORTED BY GRADE AND RELATIONSHIP TO STUDY PRODUCTS

| Relationship         | Unsolicted adverse events   |                               |                  |                             |                               |                   |                            |                              |                  |                             |                              |                  |
|----------------------|-----------------------------|-------------------------------|------------------|-----------------------------|-------------------------------|-------------------|----------------------------|------------------------------|------------------|-----------------------------|------------------------------|------------------|
|                      | Mild (n=68)                 |                               |                  | Moderate (n=100)            |                               |                   | Severe (n=0)               |                              |                  | Serious adverse event (n=1) |                              |                  |
|                      | HIV-DNA<br>600 µg<br>(n=32) | HIV-DNA<br>1,200 µg<br>(n=33) | Placebo<br>(n=3) | HIV-DNA<br>600 µg<br>(n=32) | HIV-DNA<br>1,200 µg<br>(n=45) | Placebo<br>(n=23) | HIV-DNA<br>600 µg<br>(n=0) | HIV-DNA<br>1,200 µg<br>(n=0) | Placebo<br>(n=0) | HIV-DNA<br>600 µg<br>(n=1)  | HIV-DNA<br>1,200 µg<br>(n=0) | Placebo<br>(n=0) |
| Total subjects       | 9                           | 10                            | 2                | 10                          | 9                             | 4                 | 0                          | 0                            | 0                | 1                           | 0                            | 0                |
| Not related          | 3                           | 5                             | 2                | 8                           | 6                             | 4                 | 0                          | 0                            | 0                | 1                           | 0                            | 0                |
| Probably not related | 28                          | 26                            | 1                | 24                          | 39                            | 19                | 0                          | 0                            | 0                | 0                           | 0                            | 0                |
| Possibly related     | 1                           | 2                             | 0                | 0                           | 0                             | 0                 | 0                          | 0                            | 0                | 0                           | 0                            | 0                |

Values are number of events.
